# Supplementary material for: Multivariate meta-analysis for non-linear and other multi-parameter associations
Source: PubMed Central journal article supplement (PMC3546395; doi:10.1002/sim.5471), 2012-07-16

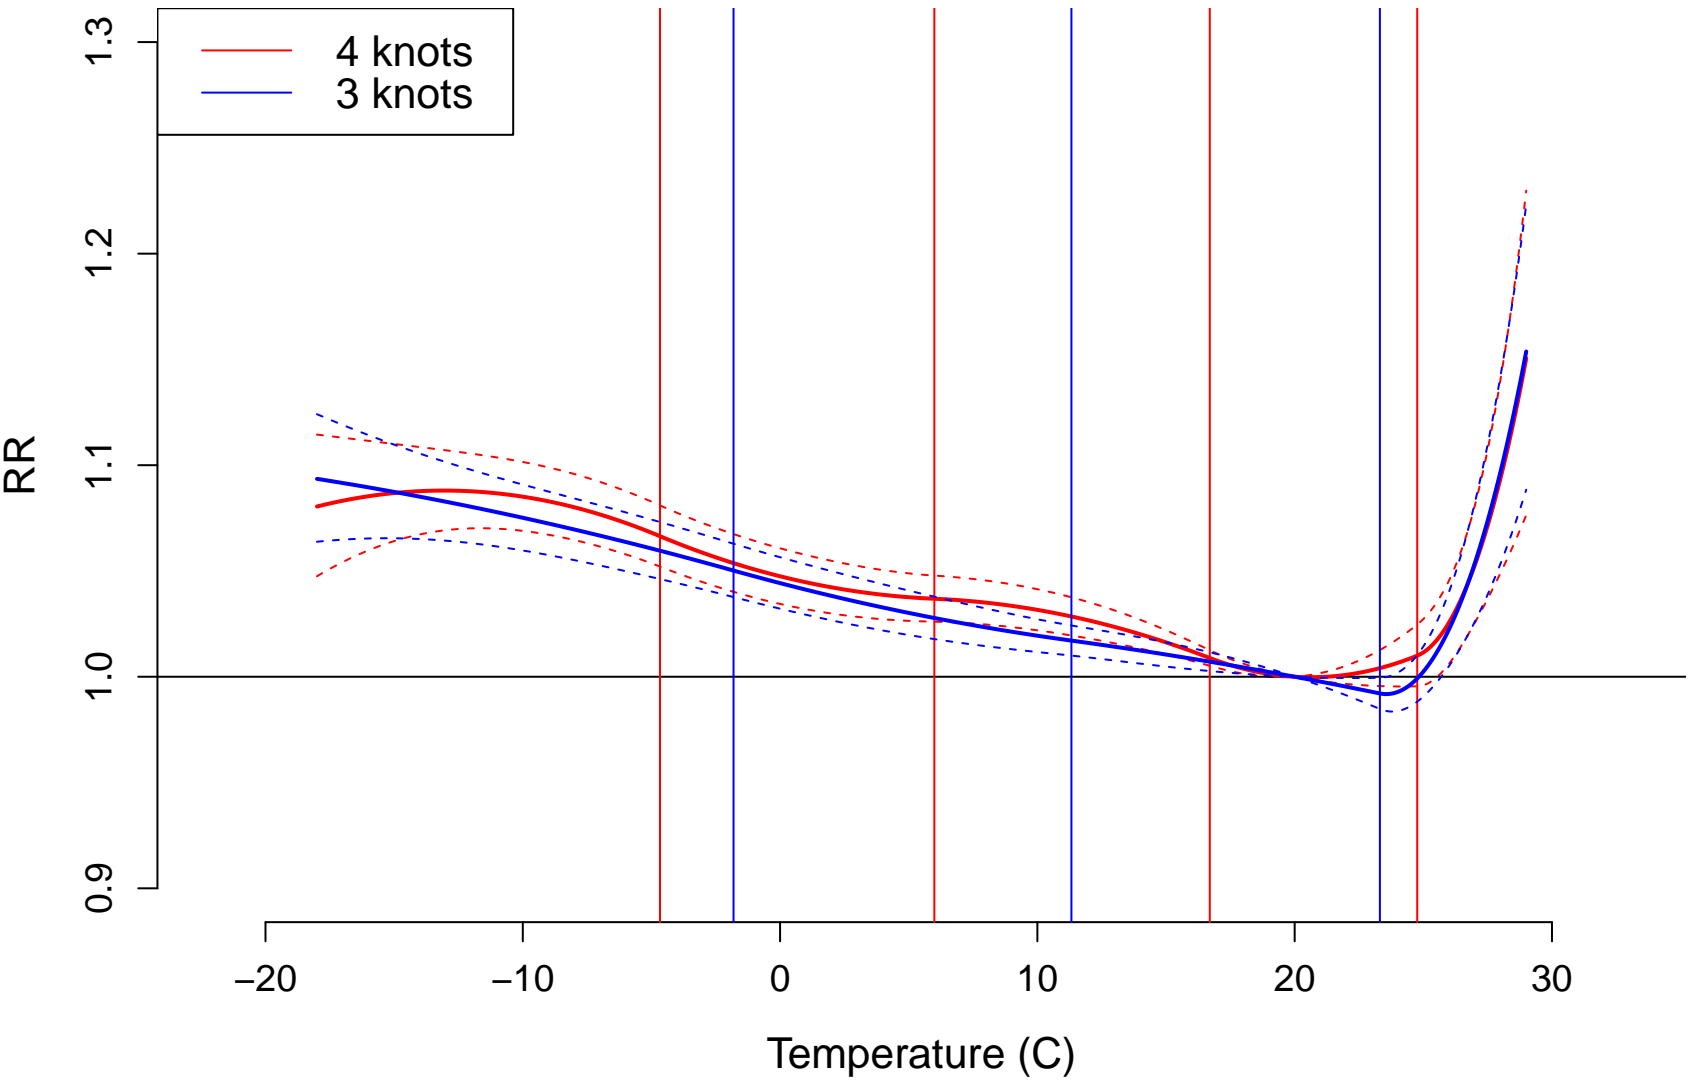

Supplement: sim0031-3821-SD9.pdf [file sim0031-3821-SD9.pdf]
